# Supplementary material for: Partial hepatectomy accelerates colorectal metastasis by priming an inflammatory premetastatic niche in the liver
Source: PubMed Central journal article supplement (PMC11196966; doi:10.3389/fimmu.2024.1388272), 2024-06-10
Supplement: Presentation_1.pdf [file Presentation_1.pdf]

## Supplementary Figures

### Supplementary Figure 1:

(A) Representative IHC staining of EpCam in premetastatic lesions (red circles), liver metastasis and primary tumor (scale bar = 100  $\mu$ m); (B) Image of the surgical set-up before and after resection of the medial hepatic lobe; (C) Volume of healthy liver in right and left lobes on postoperative day (POD) 14 of PO group (n=18), Ctrl group (n=6), SHAM group (n=6) and pHx group (n=6); (D) Time course analysis of total healthy liver volume in  $\mu$ l of Ctrl group (n=6), SHAM group (n=6) and pHx group (n=9); (E - F) Total volume (E) and number (F) of LM in MRI in right and left lobes on POD14 of Ctrl group (n=7), SHAM group (n=7) and pHx group (n=9); (G) Time course analysis of combined volume of LM in all lobes in  $\mu$ l of Ctrl group (n=7), SHAM group (n=15) and pHx group (n=19)

(Bar plots represent mean  $\pm$  SEM, p-values calculated via one-way ANOVA Tukey test, \* = p<0.05; \*\* = p<0.01; \*\*\* = p<0.001)

### Supplementary Figure 2:

(A) Flow cytometric (FACS) analysis of innate immune cells (neutrophils and monocytes) in LM (top) and peripheral blood (bottom) of PO group (n=5), Ctrl group (n=3), SHAM group (n=6/6) and pHx group (n=12/12); (B) FACS analysis of myeloid-derived suppressor cells (MDSC) in the liver (top) with changes in CD14-expression in PMN-MDSCs (bottom) of PO group (n=4), Ctrl group (n=6), SHAM group (n=5) and pHx group (n=8); (C) concentration (ng/ $\mu$ l) of bacterial DNA in LM in quantitative real-time polymerase chain reaction (qPCR) of Ctrl group (n=3), SHAM group (n=3) and pHx group (n=3); (D) FACS analysis of adaptive immune cells (CD3<sup>+</sup> T cells, CD4<sup>+</sup> T cells, CD8<sup>+</sup> T cells, B cells and NK cells) in LM; (E) Flow cytometric analysis of exhaustion, cytotoxicity and activation markers (granzyme B, T-bet, Tcf1, PD1, CD38) in CD8<sup>+</sup> T cells in healthy liver of PO group (n=3), Ctrl group (n=6), SHAM group (n=6) and pHx group (n=8).

M-MDSC=monocytic MDSC, PMN-MDSC=polymorphonuclear MDSC

(Bar plots represent mean  $\pm$  SEM)

### Supplementary Figure 3:

(A) Representative IHC staining of Ki67 in primary tumor in the orthotopic organoid transplantation mouse model (scale bar = 200  $\mu$ m); (B) *Ki67*-gene expression in primary tumors analyzed by qPCR; (C) Expression of epithelial-mesenchymal transition (EMT)-genes (*Epcam*, *Ctnnb1*, *Cdh1*, *Snai1*, *Snai2*, *Zeb1* and *Vim*) in primary tumors (analyzed by qPCR) of PO group (n=9), Ctrl group (n=4), SHAM group (n=9) and pHx group (n=21); (D) EMT-gene expression (*Epcam*, *Ctnnb1*, *Cdh1*, *Snai1*, *Snai2*) in LM analyzed by qPCR of PO group (n=3), SHAM group (n=6) and pHx group (n=9).

(Bar plots represent mean  $\pm$  SEM)

# EpCam

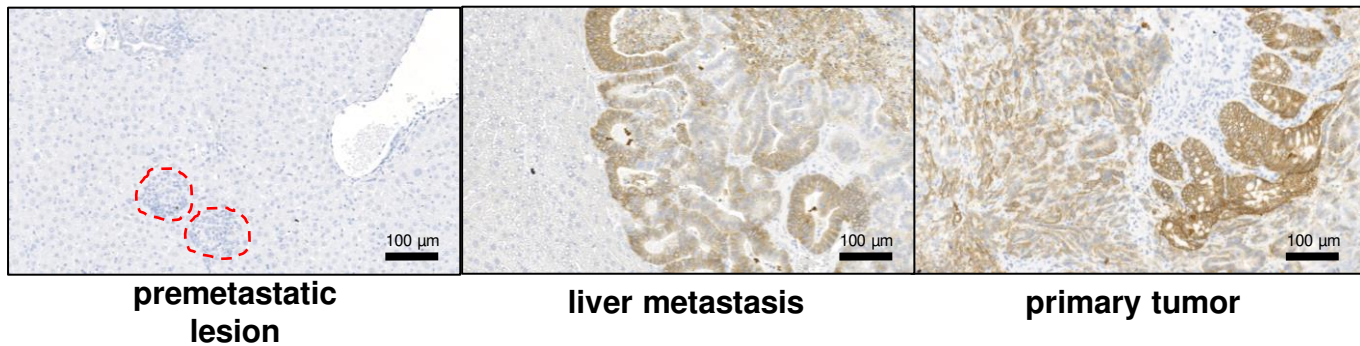

## B

before medial lobe resection

after medial lobe resection

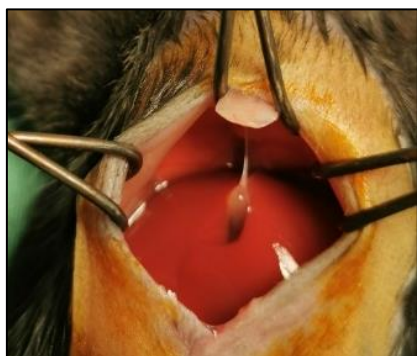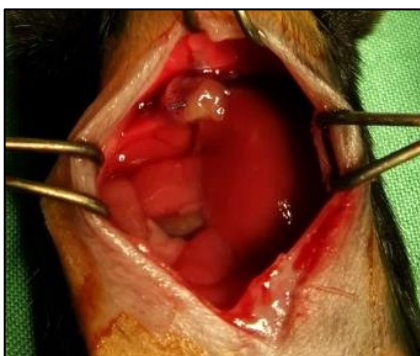

MRI volumetry

## C

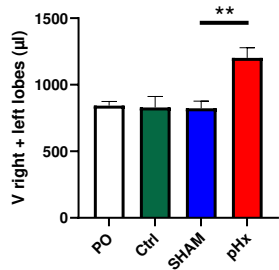

## D

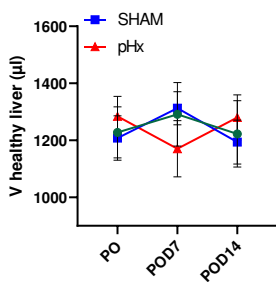

## E

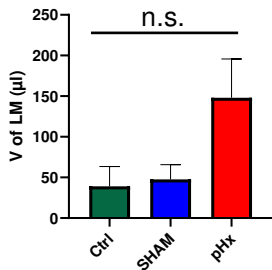

## F

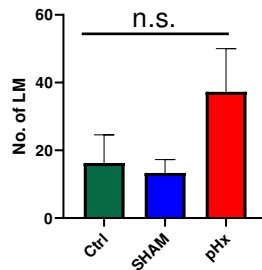

## G

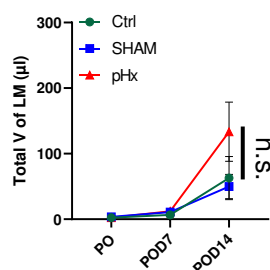

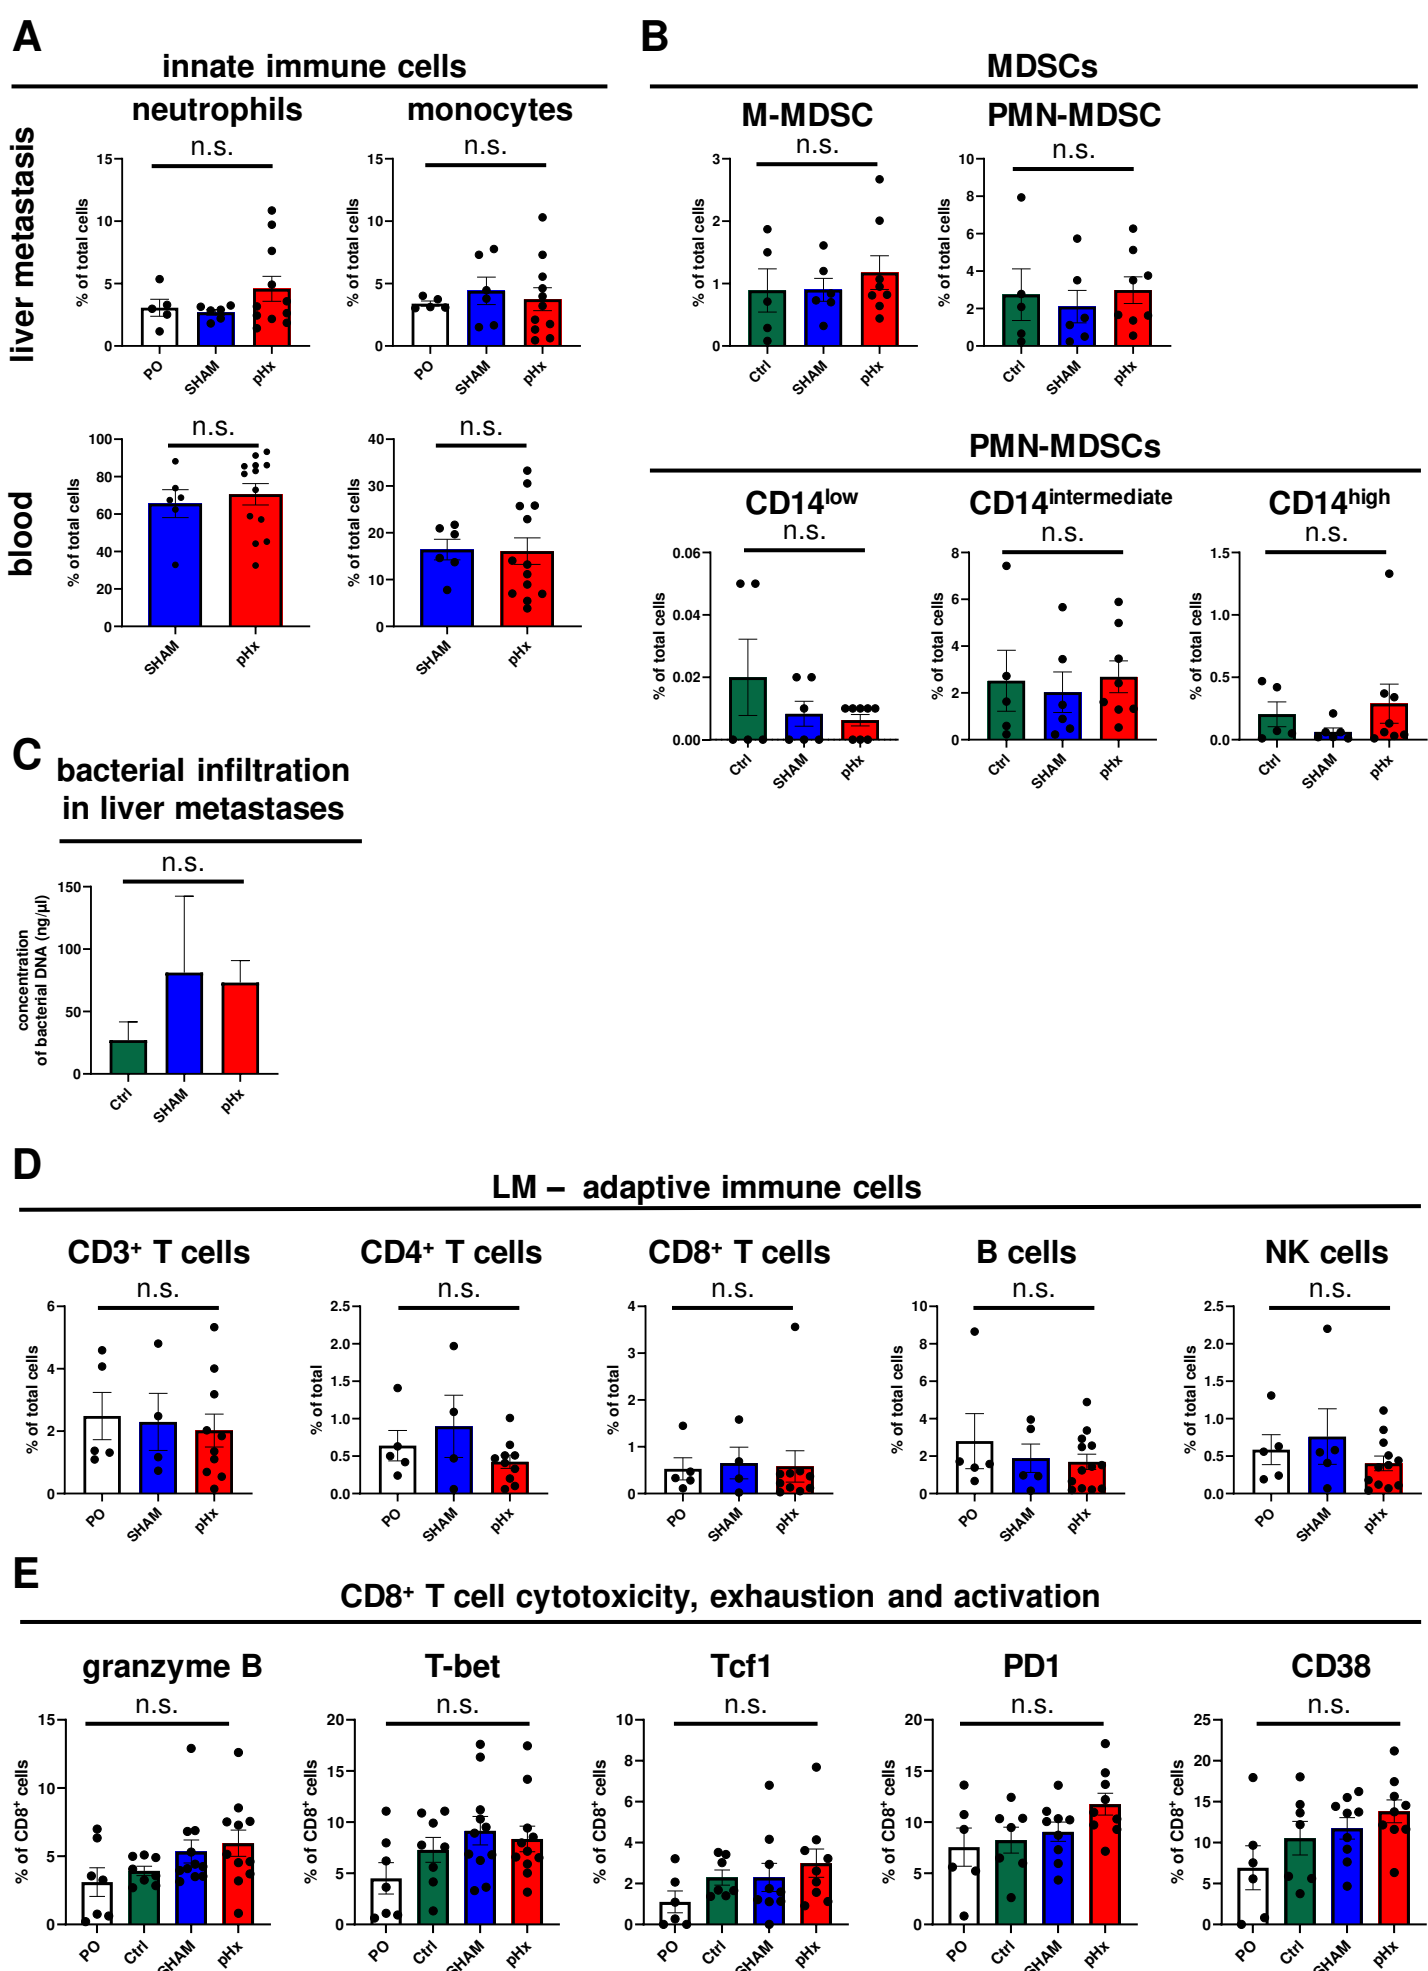

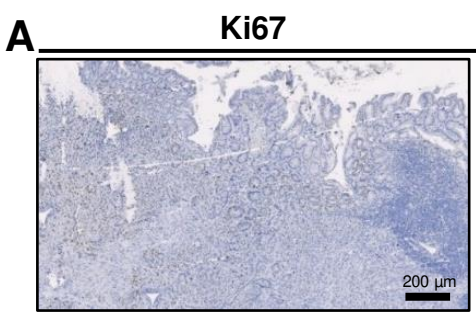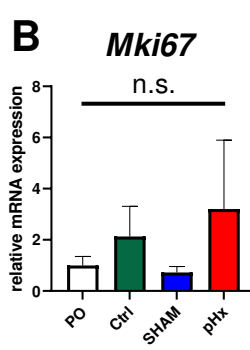

**C** **regulation of EMT-associated genes**

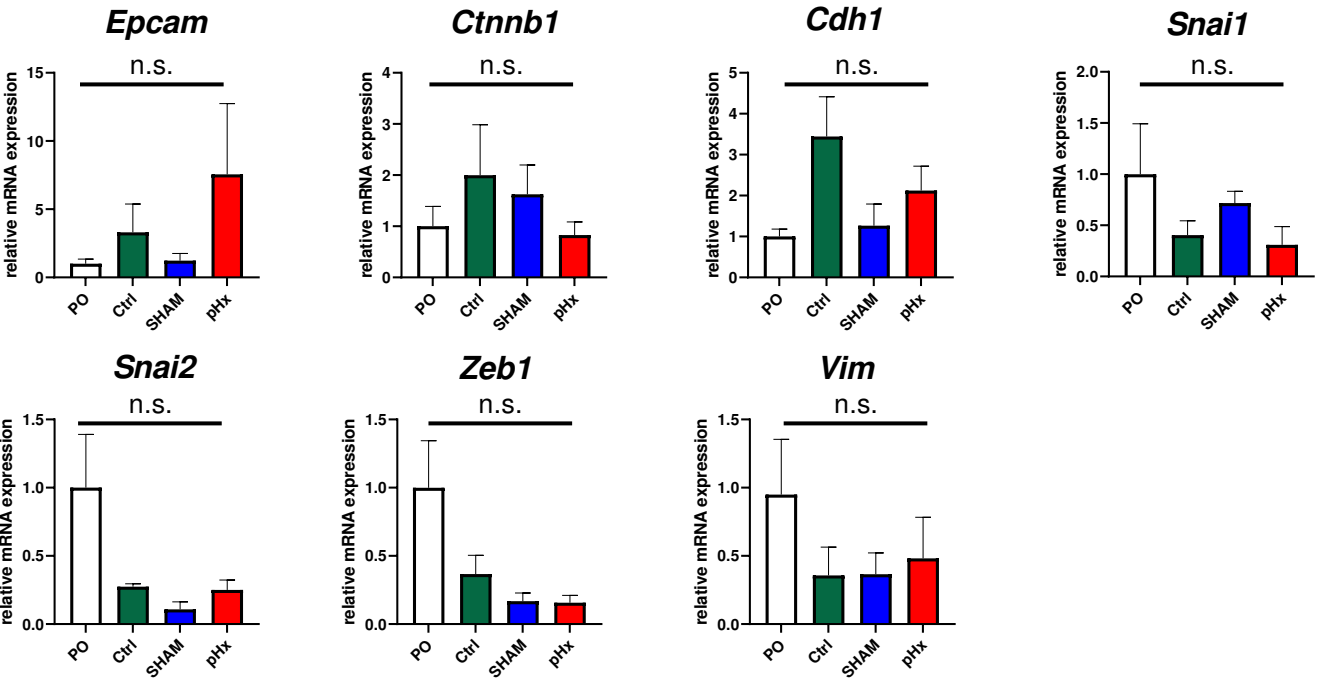

**D** **regulation of EMT-associated genes**

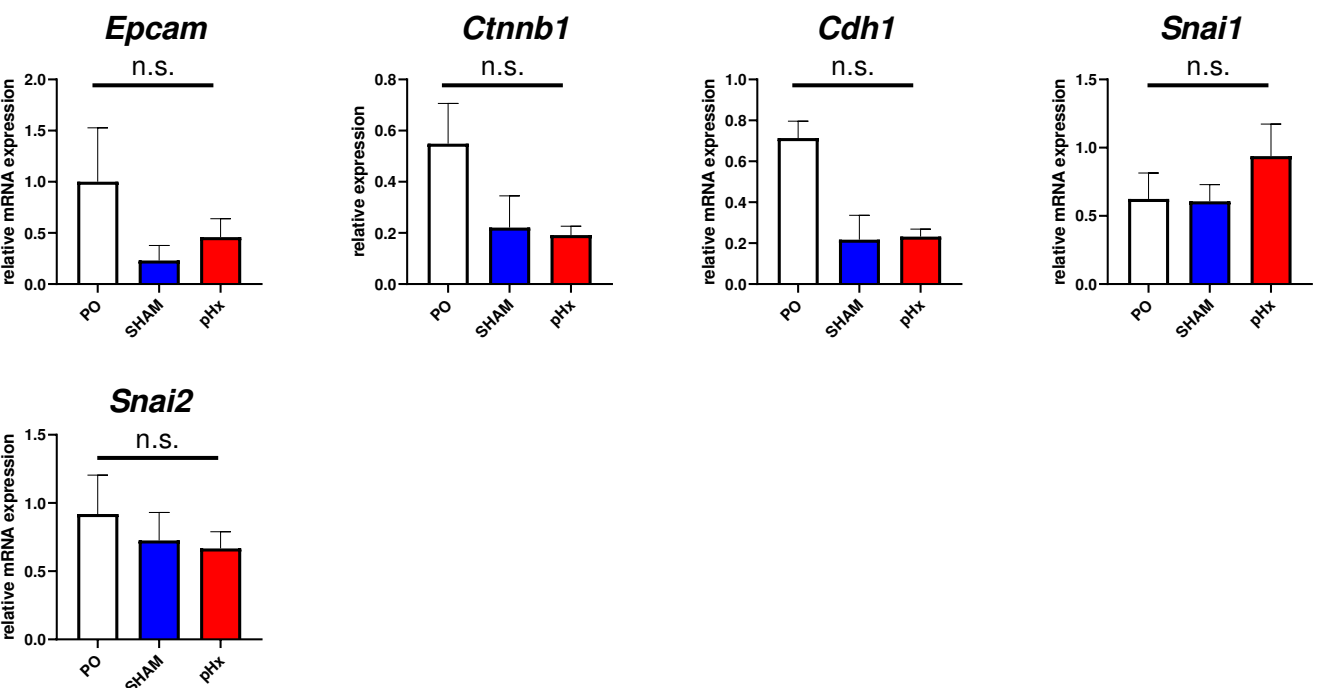

### Supplementary Methods

#### Antibodies - Immunohistochemistry/Immunofluorescence

| Antibody                        | Supplier       | Isoform      | Catalogue-Nr. | Dilution     |
|---------------------------------|----------------|--------------|---------------|--------------|
| Ki67                            | Cell Signaling | D3B5         | #9129         | 1:300        |
| CD4                             | Cell Signaling | D7D2Z        | #25229        | 1:200        |
| CD8                             | Invitrogen     | 4SM16        | #14-0195-82   | 1:25         |
| S100A8                          | Cell Signaling | E4F8V        | #47310        | 1:1000       |
| MMP9                            | Abcam          | EPR22140-154 | ab228402      | 1:1000       |
| Claudin-2                       | Cell Signaling | E1H9O        | #48120        | 1:50         |
| Occludin                        | Cell Signaling | E6B4R        | #91131        | 1:50         |
| ZO-1                            | Cell Signaling | D6L1E        | #13663        | 1:50         |
| EpCam                           | Cell Signaling | VU1D9        | #2929         | 1:500        |
| DAKOenVisionK4003 (Anti rabbit) | Agilent DAKO   | K4003        | K400311-2     | 1:250        |
| Rat on mouse HRP                | Zytomed        |              | RT517G        | Ready to use |
| donkey antiRabbit IgG AF568     | Invitrogen     | A10042       | # A10042      | 1:500        |

#### Antibodies - Western Blot

| Antibody       | Supplier        | Isoform      | Catalogue-Nr. | Dilution |
|----------------|-----------------|--------------|---------------|----------|
| $\beta$ -Actin | Cell Signalling | 13E5         | #4970         | 1:1000   |
| S100A8         | Cell Signaling  | E4F8V        | #47310        | 1:1000   |
| MMP9           | Abcam           | EPR22140-154 | ab228402      | 1:1000   |
| Claudin-2      | Cell Signaling  | E1H9O        | #48120        | 1:1000   |
| Occludin       | Cell Signaling  | E6B4R        | #91131        | 1:1000   |
| ZO-1           | Cell Signaling  | D6L1E        | #13663        | 1:1000   |
| rabbit-IgG-HRP | Cell Signaling  |              | #7074         | 1:2000   |

### Antibodies - Fluorescence activated cell sorting (FACS)

| Antibody            | Supplier                       | Isoform     | Catalogue-Nr. | Dilution  |
|---------------------|--------------------------------|-------------|---------------|-----------|
| B220 - APC          | BioLegend                      | RA3-6B2     | 103211        | undiluted |
| CD3 – BV421         | BioLegend                      | 17A2        | 100227        | undiluted |
| CD3 – BV785         | BioLegend                      | 17A2        | 100231        | undiluted |
| CD4 – PercpCy5.5    | BioLegend                      | GK1.5       | 100434        | undiluted |
| CD8a – PE-Dazzle594 | BioLegend                      | 53-6.7      | 100761        | undiluted |
| CD11b - PeCy7       | BioLegend                      | M1/70       | 101215        | undiluted |
| CD11c - APC         | BD<br>Biosciences              | HL3         | 561119        | undiluted |
| CD14 - PE           | BioLegend                      | Sa14-2      | 123309        | undiluted |
| CD16/32             | BioLegend                      | 93          | 101319        | undiluted |
| CD19 - FITC         | BioLegend                      | 1D3/CD19    | 152404        | undiluted |
| CD38 - PE           | BioLegend                      | 90          | 102707        | undiluted |
| CD45 - e450         | Thermo<br>Fisher<br>Scientific | 30-F11      | 48-0451-80    | undiluted |
| CD45 – AF700        | BioLegend                      | 30-F11      | 103127        | undiluted |
| CD64 - PercpCy5.5   | BioLegend                      | X54-5/7.1   | 139307        | undiluted |
| FoxP3 - PE          | BioLegend                      | 150D        | 320012        | undiluted |
| GranzymeB – PE Cy7  | BioLegend                      | QA16A02     | 372213        | undiluted |
| IL-10 – Vio515      | Miltenyi                       | REA1008     | 130-116-968   | undiluted |
| Ly6G - FITC         | BD<br>Biosciences              | 1A8         | 551460        | undiluted |
| Ly6C - PerCPCy5.5   | BioLegend                      | HK1.4       | 128012        | undiluted |
| MHCII - PE          | BioLegend                      | M5/114.15.2 | 107608        | undiluted |
| NK1.1 – BV510       | BioLegend                      | PK136       | 108737        | undiluted |
| NK1.1 – BV605       | BioLegend                      | PK136       | 108739        | undiluted |
| PD1 – BV510         | BioLegend                      | 29F.1A12    | 135241        | undiluted |
| Tbet – AF488        | BioLegend                      | 4B10        | 644829        | undiluted |
| Tcf1 – AF488        | R&D<br>Systems                 | 812145      | IC8224G       | undiluted |

## qPCR Primers

| Gene            | 5'-3' Sequence forward     | 5'-3' Sequence reverse    |
|-----------------|----------------------------|---------------------------|
| <i>18S</i>      | GTAACCCGTTGAACCCCAT        | CCATCCAATCGGTAGTAGCG      |
| <i>Cldn2</i>    | AAGGCCTAGGATGTAGCCCA       | CGGCTCCGTTTTCTAGATGC      |
| <i>Cldn5</i>    | TTCTATGATCCGACGGTGCC       | ACTTGACCCGGGAAGCTGAAC     |
| <i>Cdhn1</i>    | ATCCTCGCCCTGCTGATT         | ACCACCGTTCTCCTCCGTA       |
| <i>Epcam</i>    | GATTCTGCACGTGAGACCTG       | GATACCAAGTCAAACCGAGAACTT  |
| <i>Fn1</i>      | CGGAGAGAGTGCCCCTACTA       | CGATATTGGTGAATCGCAGA      |
| <i>Hif1a</i>    | CATGATGGCTCCCTTTTTCA       | GTCACCTGGTTGCTGCAATA      |
| <i>Il6</i>      | GCTACCAAACCTGGATATAATCAGGA | CCAGGTAGCTATGGTACTCCAGAA  |
| <i>mKi67</i>    | AGGGTAACTCGTGGAACCAA       | TCTTAACTTCTTGGTGCATACAATG |
| <i>Lox</i>      | TATGCCTGCACCTCTCACAC       | TGTCCGCATTGTATGTGTCAT     |
| <i>Mmp2</i>     | AACTTTGAGAAGGATGGCAAGT     | TGCCACCCATGGTAAACAA       |
| <i>Mmp9</i>     | AGACGACATAGACGGCATCC       | TCGGCTGTGGTTCAGTTGT       |
| <i>Ocln</i>     | AGGCACGGGTAGCACTCACG       | CATAGTTCTTCTTGTTCGTAATC   |
| <i>S100a9</i>   | CAGTTGGCAACCTTTATGAAGAA    | CTCAGCTGATTGTCCTGGTTT     |
| <i>Snai2</i>    | CATTGCCTTGTGTCTGCAAG       | CAGTGAGGGCAAGAGAAAGG      |
| <i>Snai1</i>    | GTCCAGCTGTAACCATGCC        | TGTCACCAGGACAAATGGGG      |
| <i>Tgfb1</i>    | TGGAGCAACATGTGGAAGTCTC     | GTCAGCAGCCGGTTACCA        |
| <i>Timp1</i>    | GCAAAGAGCTTTCTCAAAGACC     | AGGGATAGATAAACAGGGAAACACT |
| <i>Vegfa</i>    | TTAAACGAACGTACTTGCAGATG    | AGAGGTCTGGTTCCTCCGAAA     |
| <i>Vimentin</i> | CCAACCTTTTCTTCCCTGAAC      | TTGAGTGGGTGTCAACCAGA      |
| <i>Zeb1</i>     | ACCCCTTCAAGAACCCTTT        | CAATTGGCCACCACTGCTAA      |
| <i>Zo1</i>      | GCCTTGAACCTTTGACCTCTGC     | CAGAAATCGTGCTGATGTGCC     |
| <i>Ctnnb1</i>   | TGCAGATCTTGGACTGGACAT      | AAGAACGGTAGCTGGGATCA      |

## Primer Bacterial 16s qPCR

5'-CNACGCGAAGAACCTTANC-3'

5'- ATACGCGARGAACCTTACC-3'

5'-CTAACCGANGAACCTYACC-3'

5'- CAACGCGMARAACCTTACC-3'

5'-CGACRRCCATGCANCACCT-3'

## Other items (drugs, equipment, kits etc.)

| Item                    | Supplier                      |
|-------------------------|-------------------------------|
| BioSpec 94/21           | Bruker Biospin, Germany       |
| Beckman Coulter Gallios | Beckman Coulter, USA          |
| BD LSRFortessa          | Becton Dickinson, Switzerland |
| AxioScan 7              | Zeiss, Germany                |
| ChemiDoc XRS+           | BioRad, USA                   |

|                                                    |                          |
|----------------------------------------------------|--------------------------|
| Cultrex RGF basement membrane extract (BME) Type 2 | R&D Systems, USA         |
| CollagenI rat tail                                 | Ibidi, Germany           |
| Tumor dissociation kit, mouse                      | Miltenyi Biotec, Germany |
| Liver dissociation kit, mouse                      | Miltenyi Biotec, Germany |
| RNAeasy mini kit                                   | Qiagen, Netherlands      |
| DNeasy Blood & Tissue Kit                          | Qiagen, Netherlands      |
| ProtoScript II First Strand cDNA Synthesis Kit     | New England Biolabs, USA |
| QuantiTect SYBR Green RT PCR mastermix             | Qiagen, Netherlands      |
| Isofluran-Piramal                                  | Piramal, India           |
| Buprenorphine (Temgesic)                           | Schering-Plough, USA     |
| Seprafilm                                          | Baxter, USA              |
| Vicryl 6-0                                         | Ethicon, USA             |
